# Supplementary material
Source: ML conference proceedings conference paper supplement (https://aclanthology.org/2026.semeval-1.298)

## Code snippet

```
def is_wilson_prime(p):  
    if not isinstance(p, int) or p < 2:  
        return False  
    factorial = 1  
    for i in range(2, p):  
        factorial *= i  
    return (factorial + 1) % (p * p) == 0
```

Code

```
# Example usage:  
# print(is_wilson_prime(5)) # True  
# print(is_wilson_prime(563)) # True  
# print(is_wilson_prime(2)) # False
```

Comments

This function checks whether a given number `p` is a Wilson prime. It calculates  $(P-1)! + 1$  and checks if it is divisible by  $P * P$ . Be cautious with large numbers due to factorial growth.

Natural  
Language

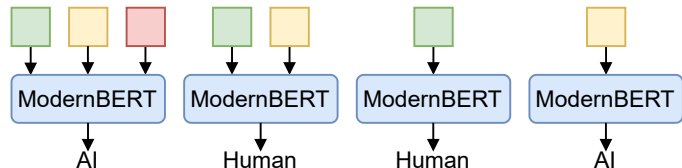

Supplement: SupplementaryMaterial [file WWTC_Teaser.drawio.pdf › images/WWTC_Teaser.drawio.pdf]
