# Supplementary material
Source: ML conference proceedings conference paper supplement (https://aclanthology.org/2026.semeval-1.298)

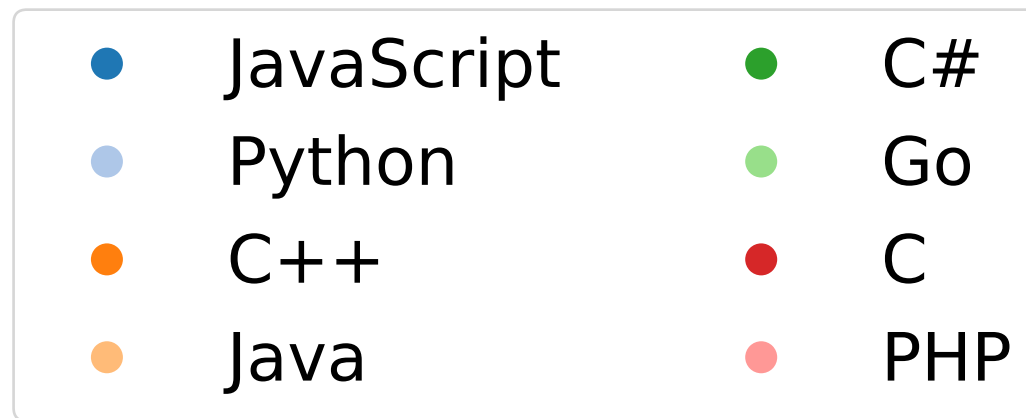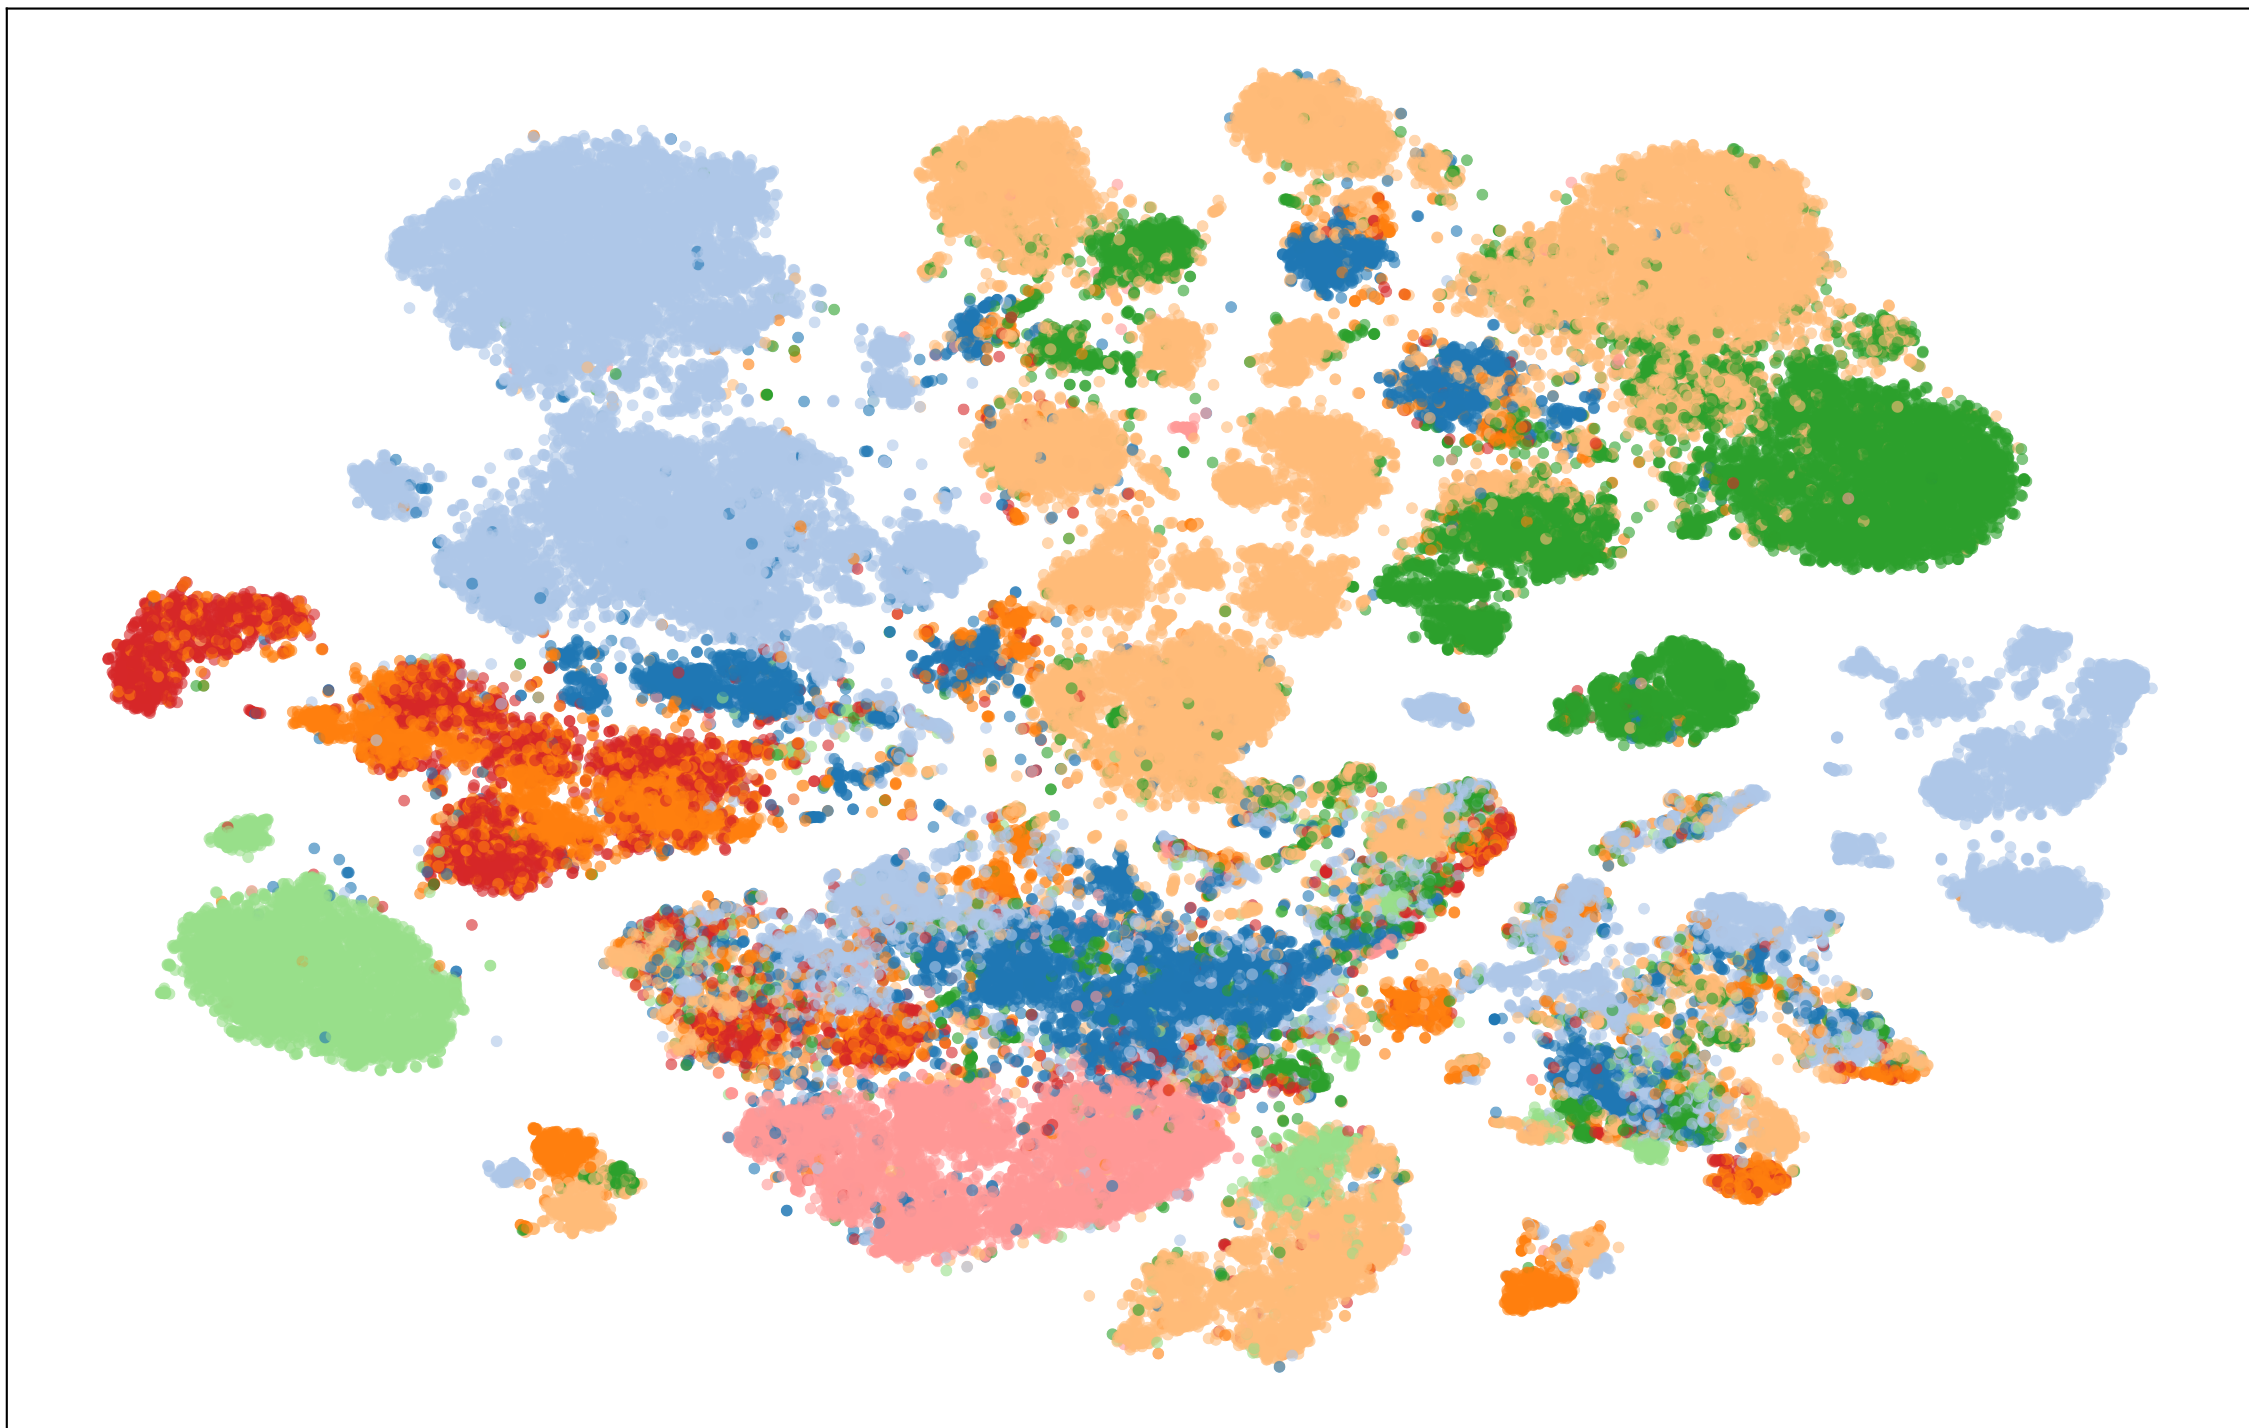

Supplement: SupplementaryMaterial [file ModernBERT-large_tsne_lang_B.pdf › images/ModernBERT-large_tsne_lang_B.pdf]

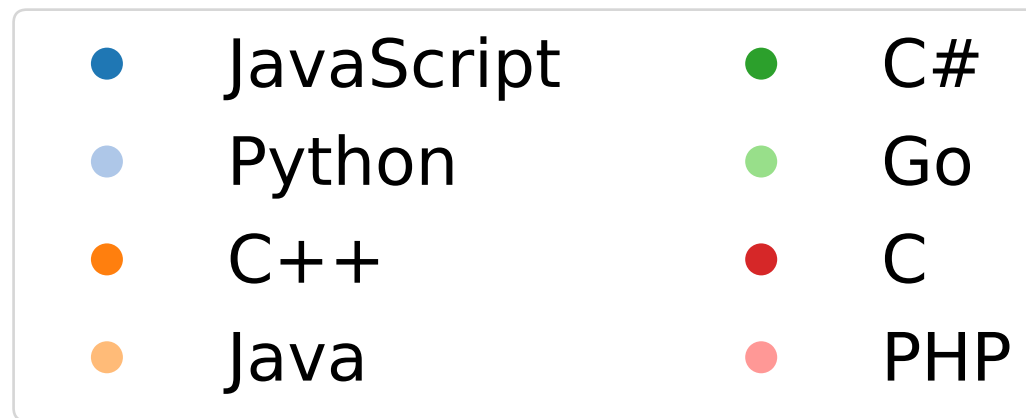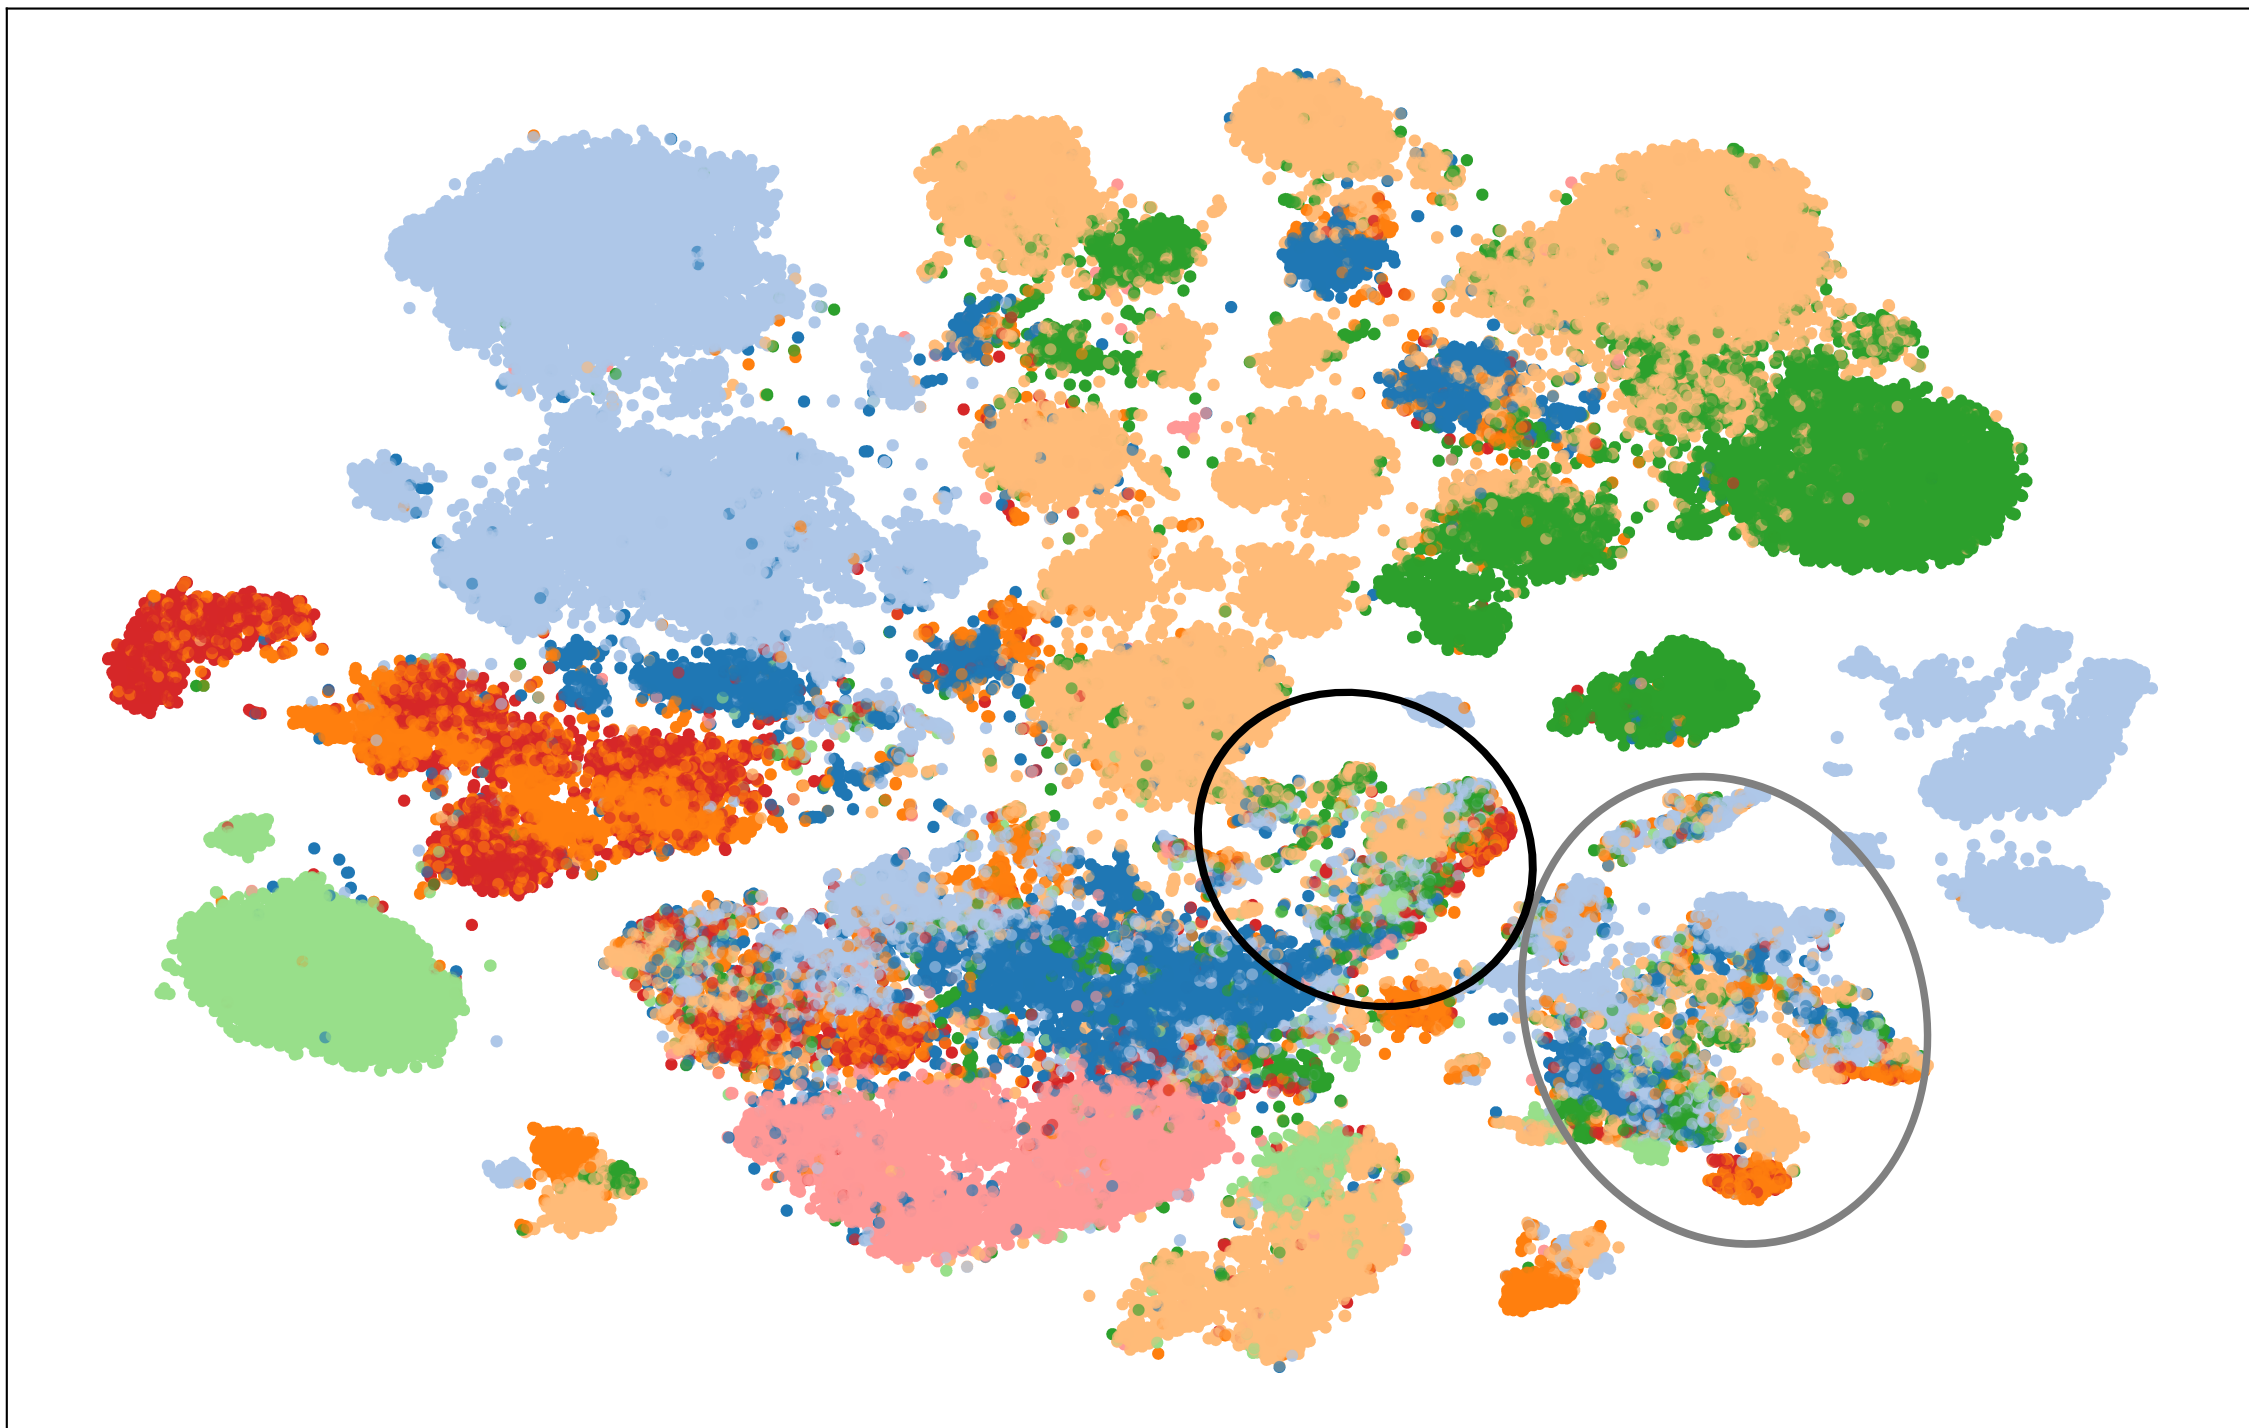

Supplement: SupplementaryMaterial [file ModernBERT-large_tsne_lang_B_test.pdf › images/ModernBERT-large_tsne_lang_B_test.pdf]

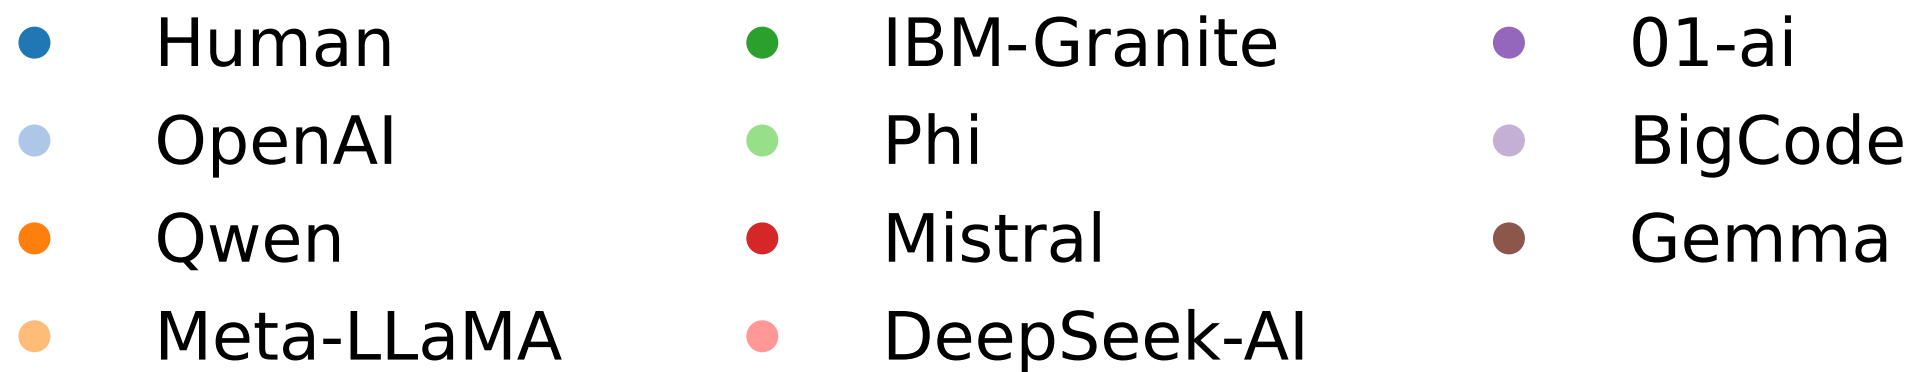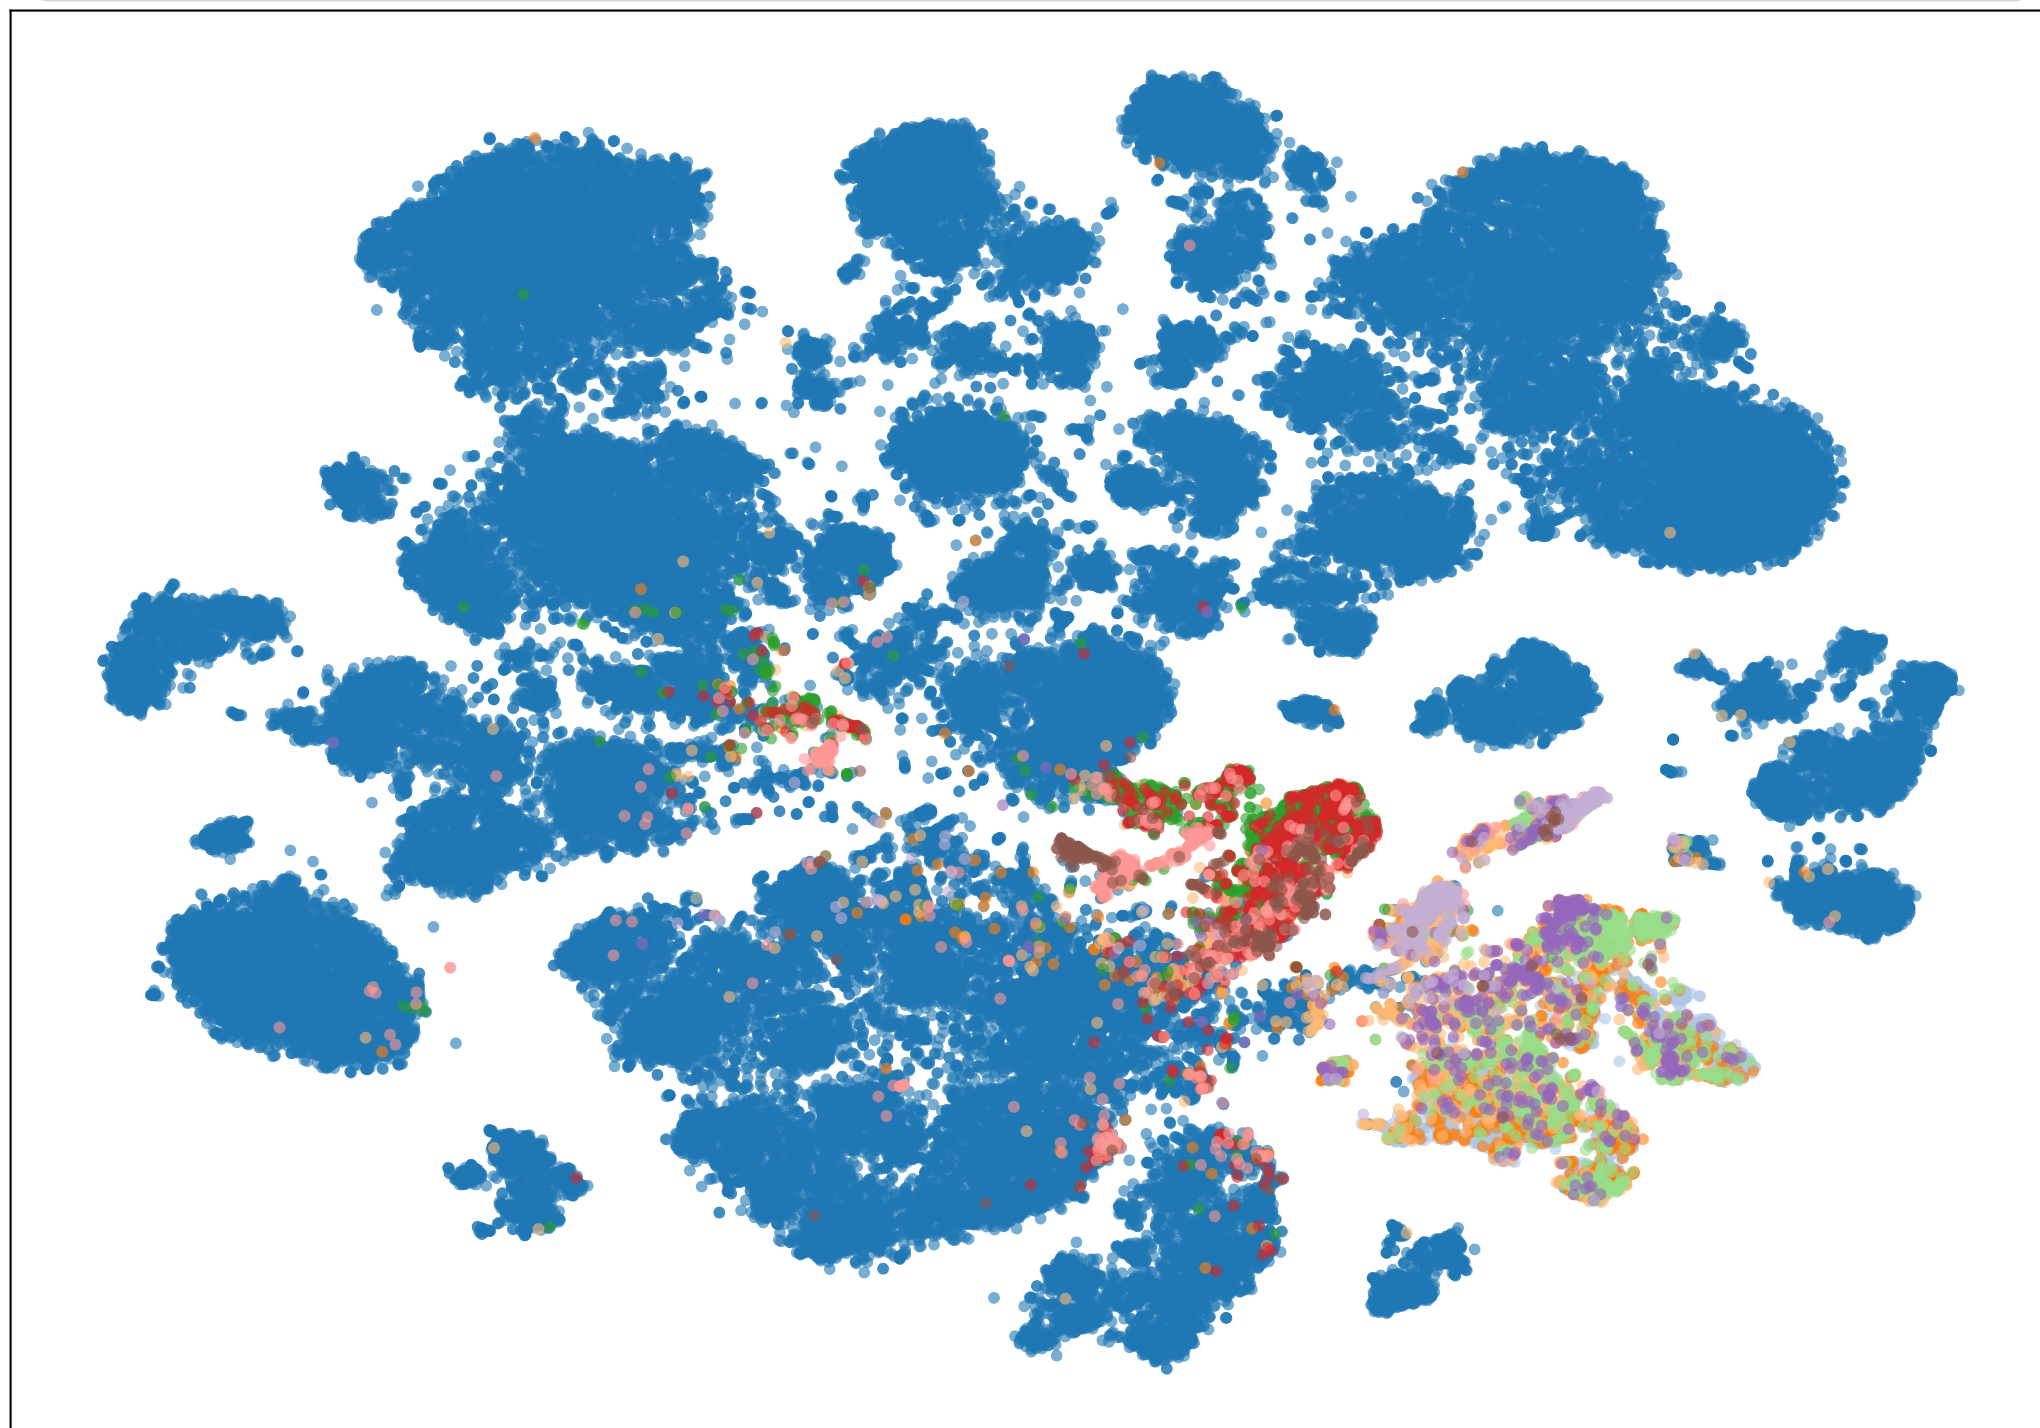

Supplement: SupplementaryMaterial [file ModernBERT-large_tsne_task_B.pdf › images/ModernBERT-large_tsne_task_B.pdf]

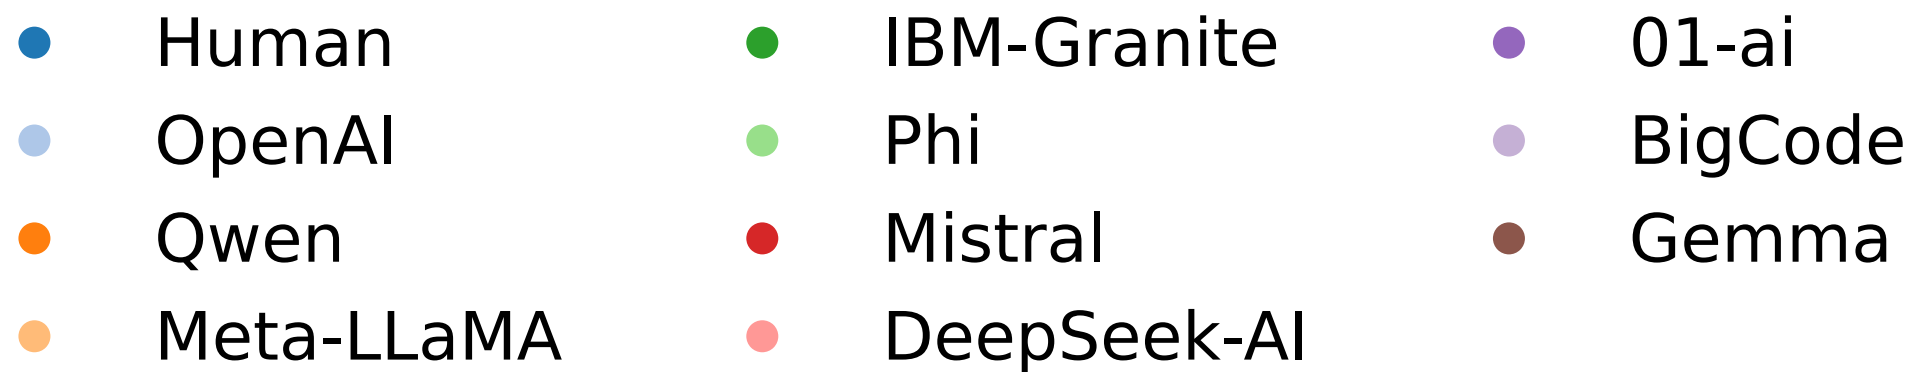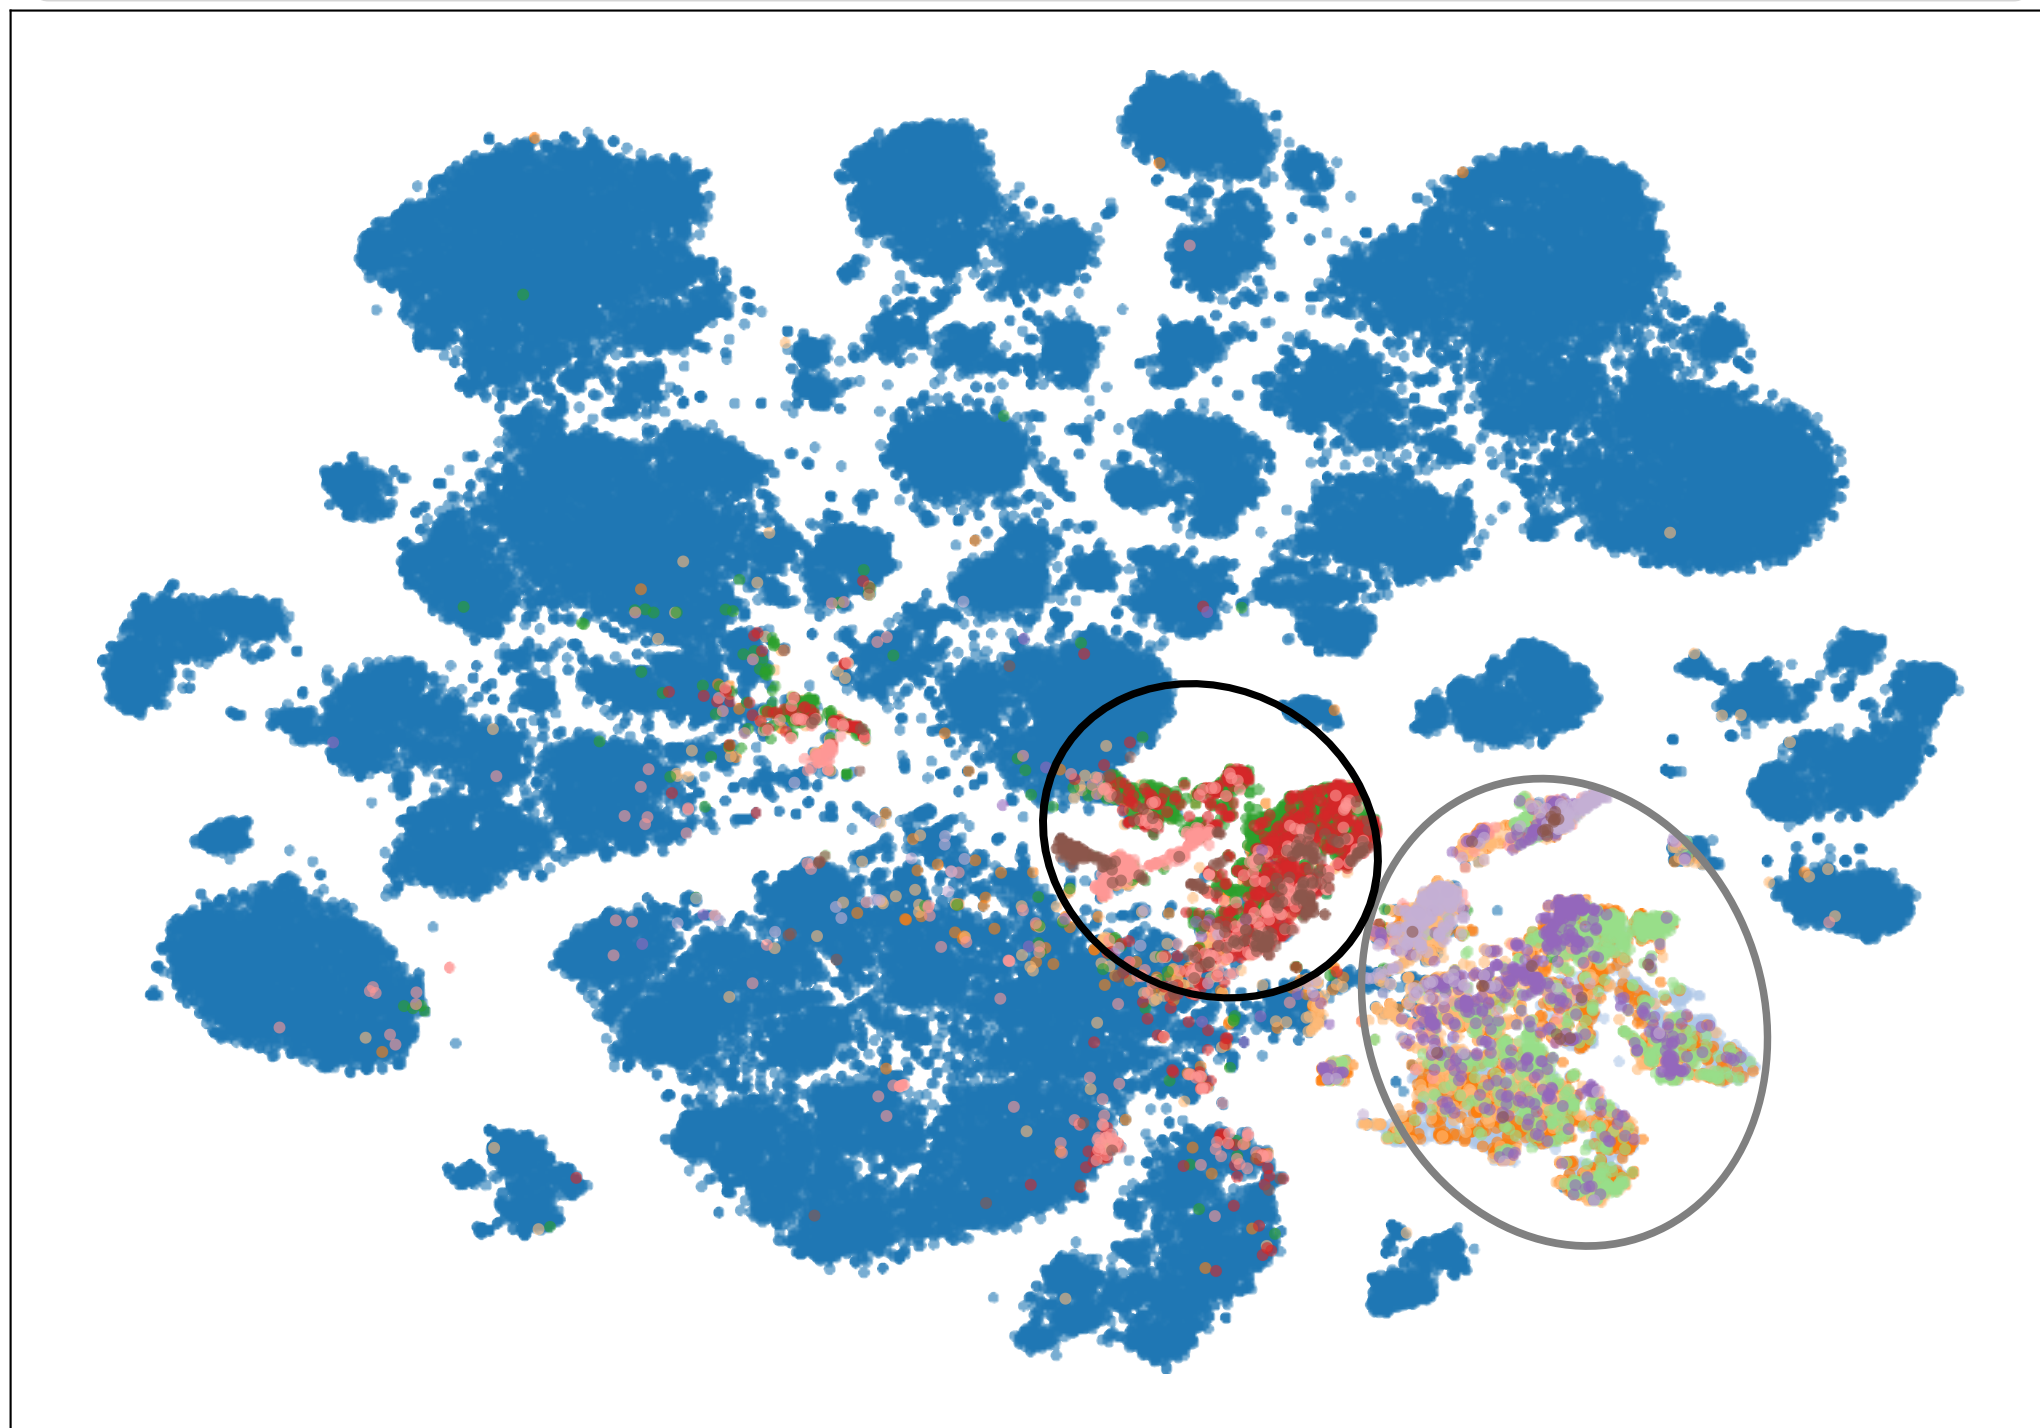

Supplement: SupplementaryMaterial [file ModernBERT-large_tsne_task_B_markiert.pdf › images/ModernBERT-large_tsne_task_B_markiert.pdf]

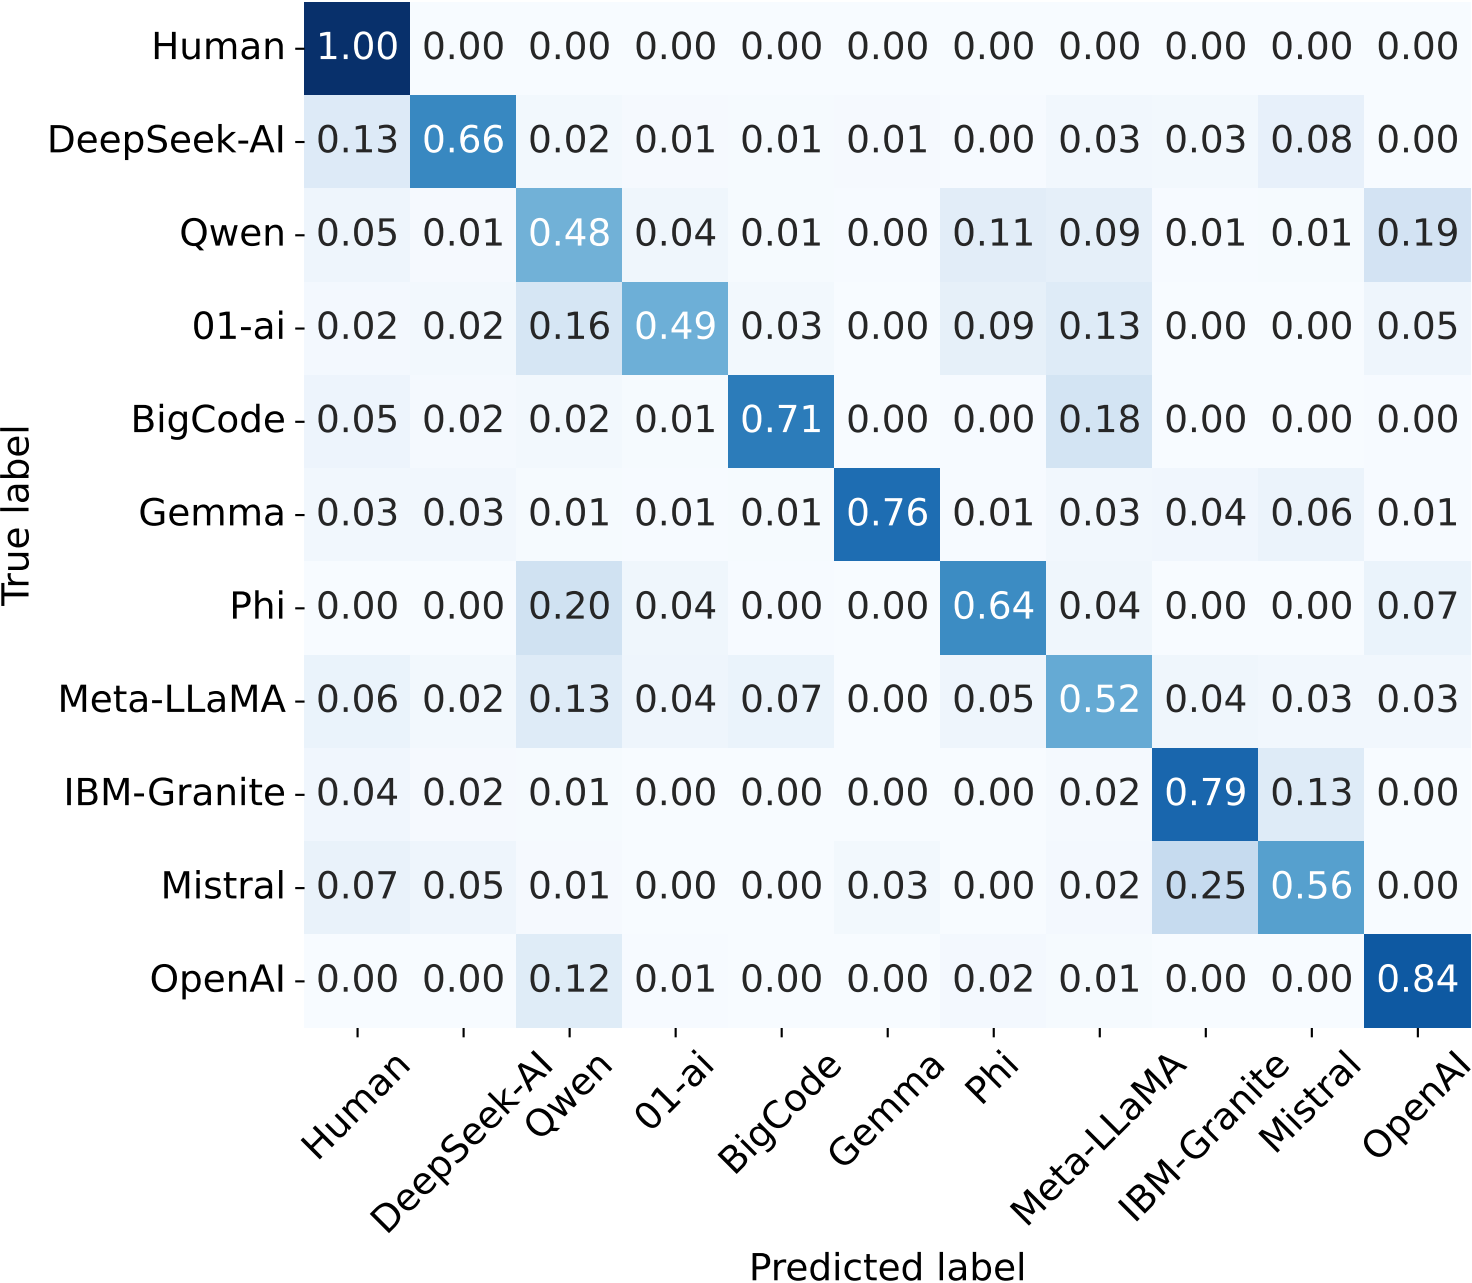

Supplement: SupplementaryMaterial [file modernbert_B_confusion_matrix.pdf › images/modernbert_B_confusion_matrix.pdf]

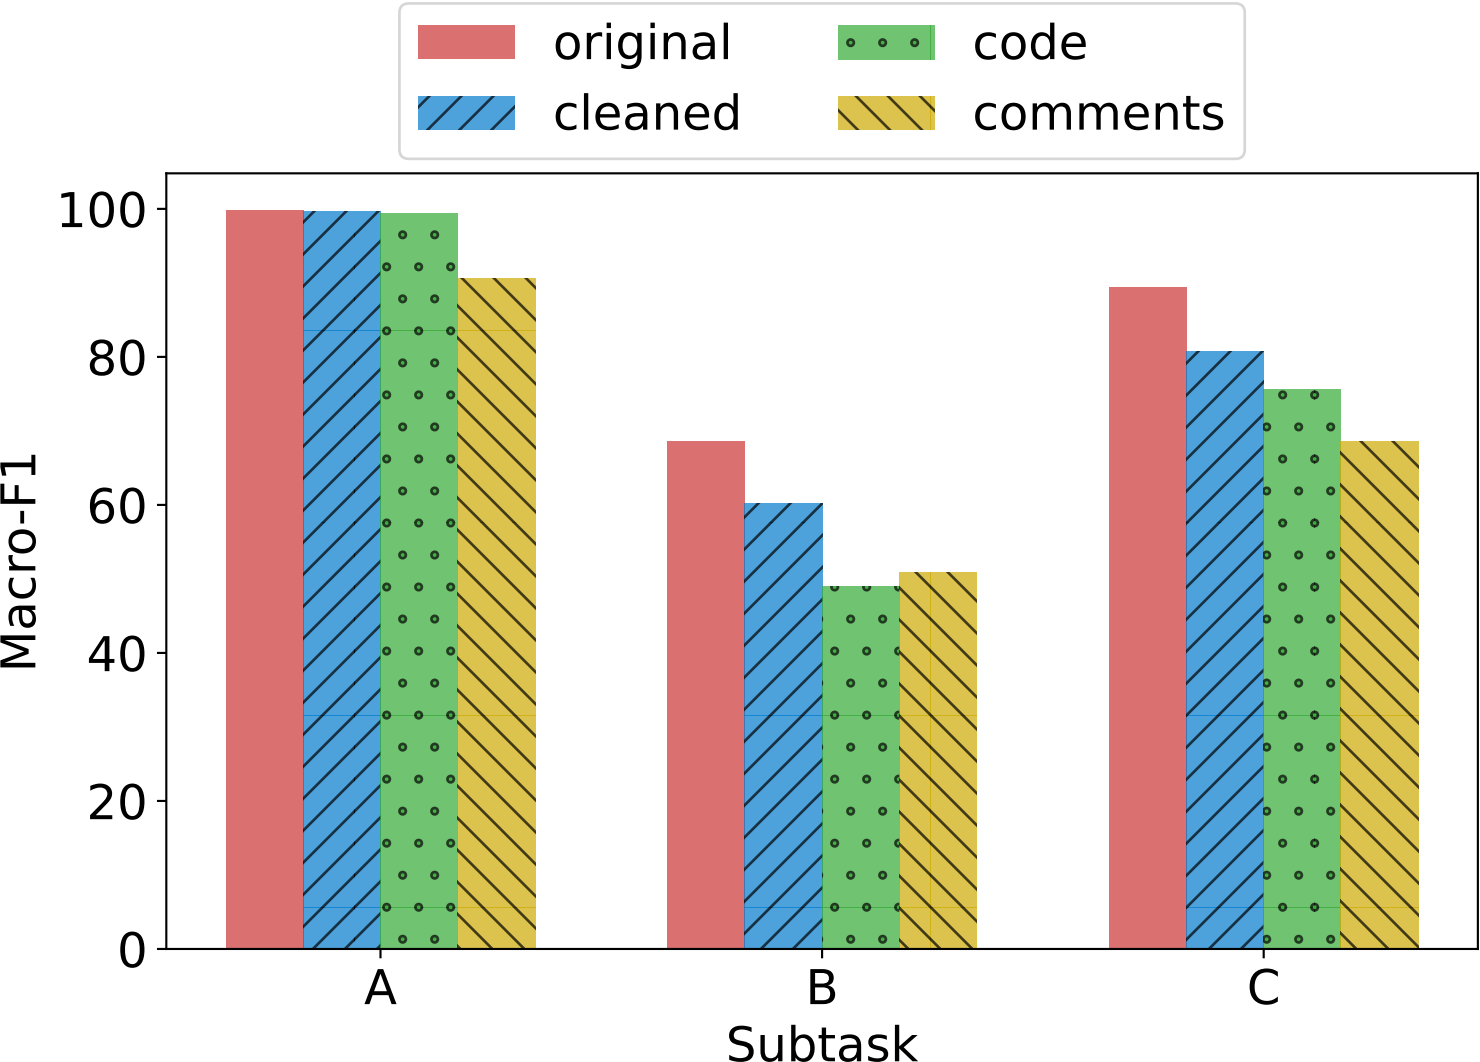

Supplement: SupplementaryMaterial [file modernbert_clean_ablation.pdf › images/modernbert_clean_ablation.pdf]

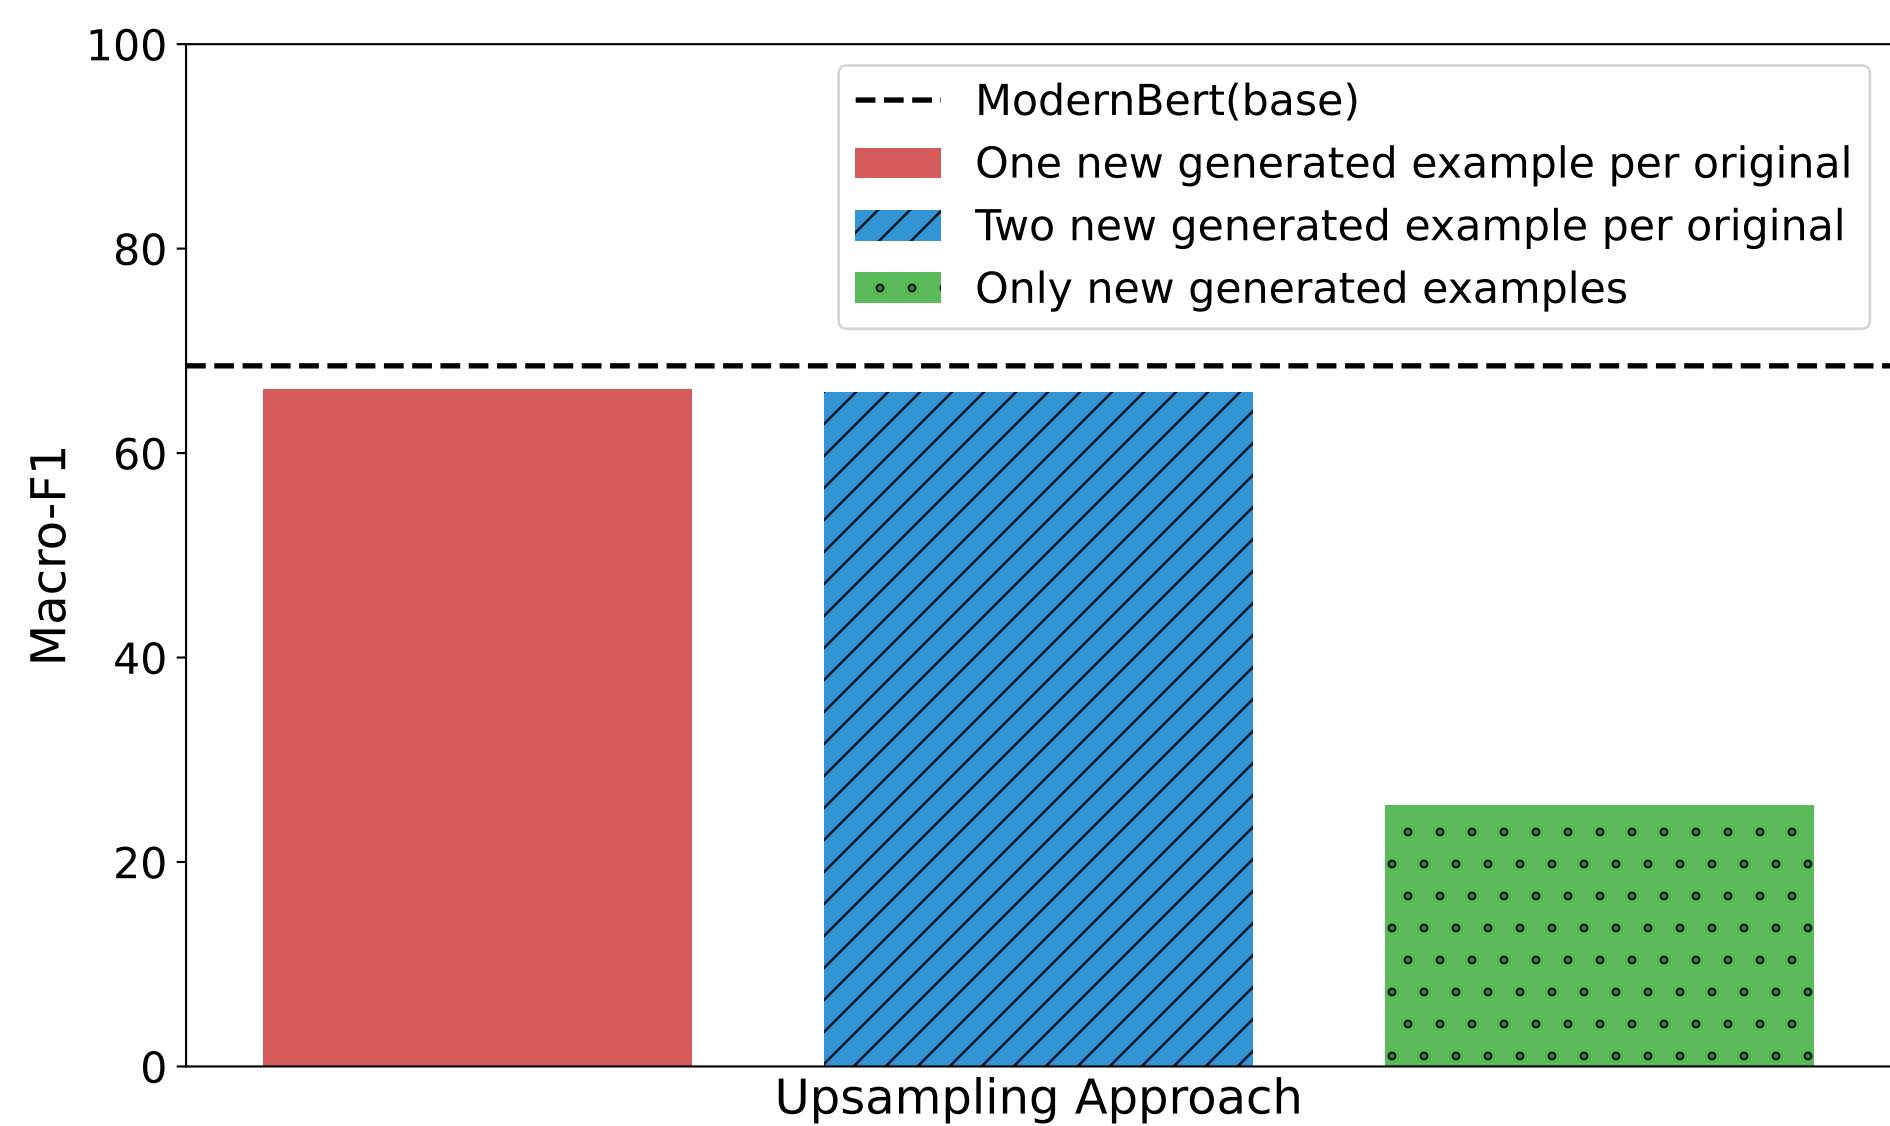

Supplement: SupplementaryMaterial [file upsampling.pdf › images/upsampling.pdf]
